# Supplementary material
Source: PubMed Central journal article supplement (PMC3115812)

# White Matter Hyperintensity Standards

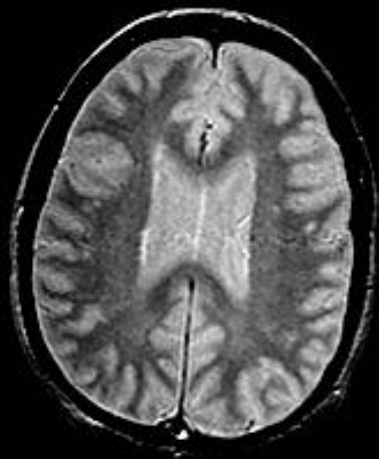

1

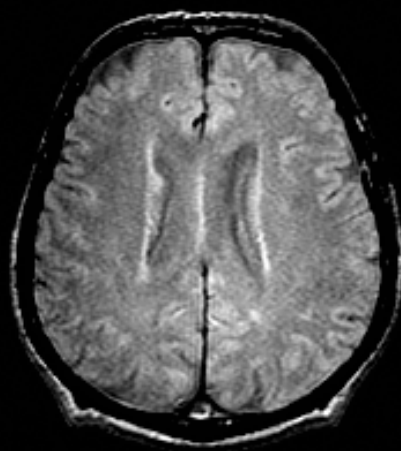

2

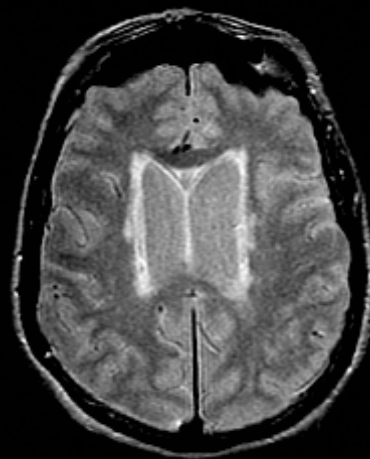

3

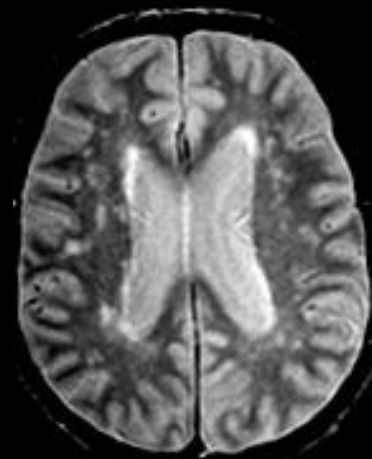

4

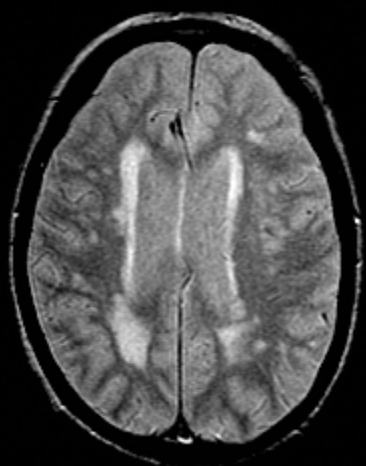

5

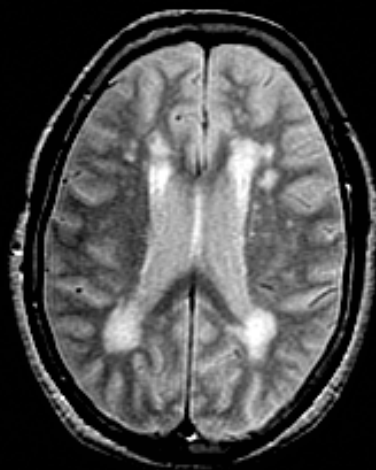

6

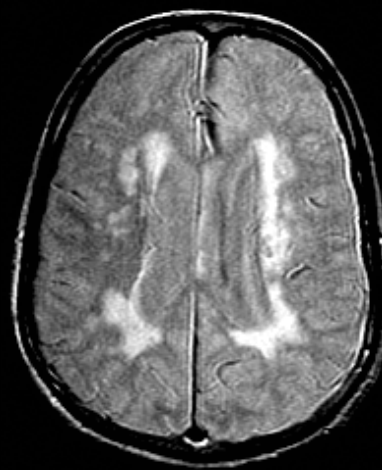

7

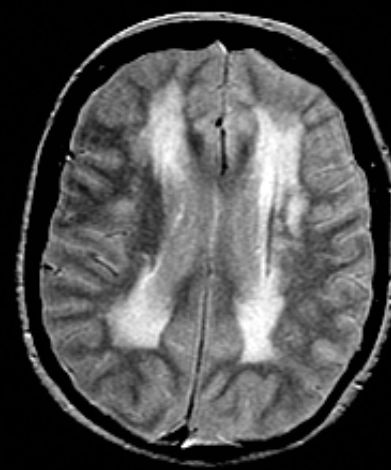

8

# Ventricle Standards

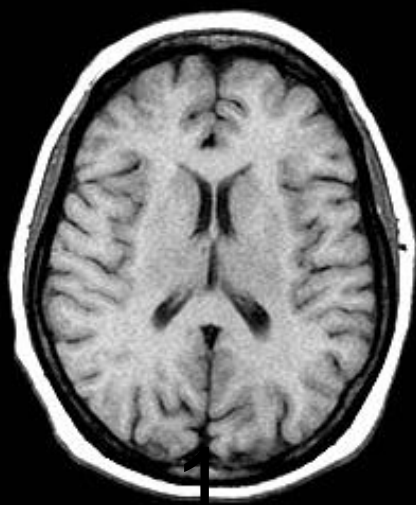

1

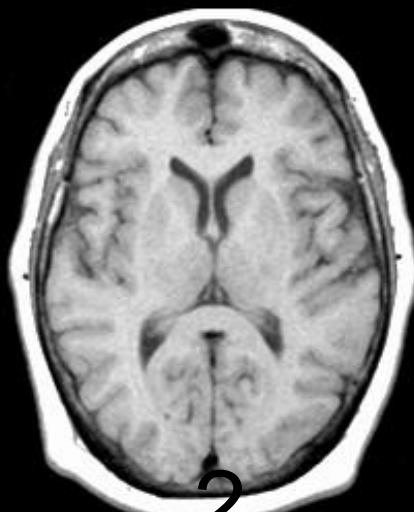

2

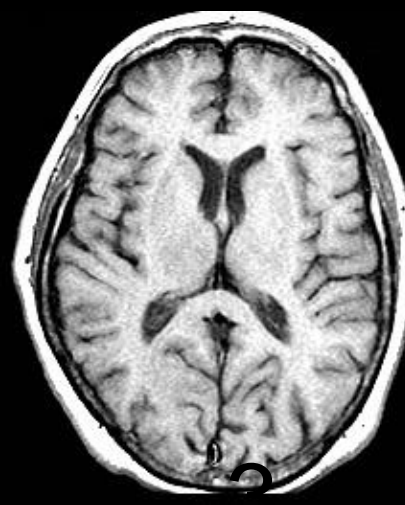

3

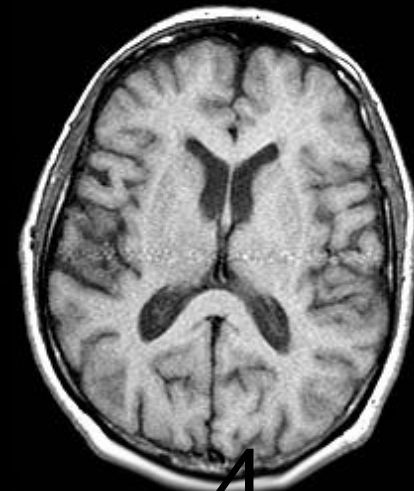

4

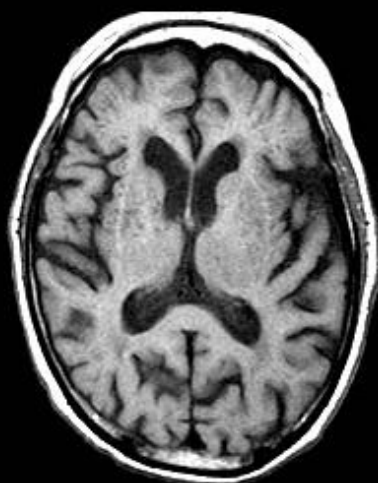

5

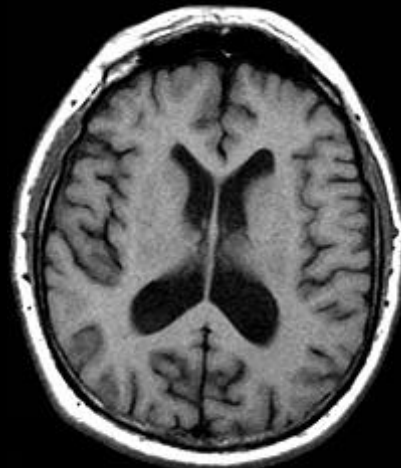

6

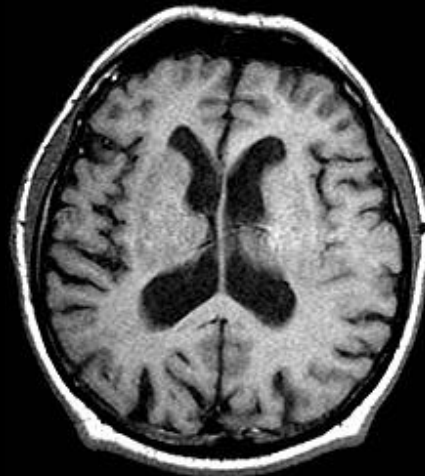

7

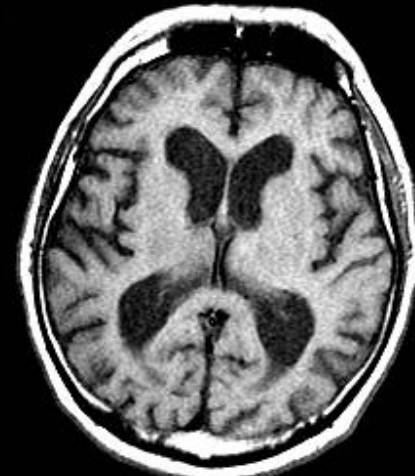

8

# Sulci Standards

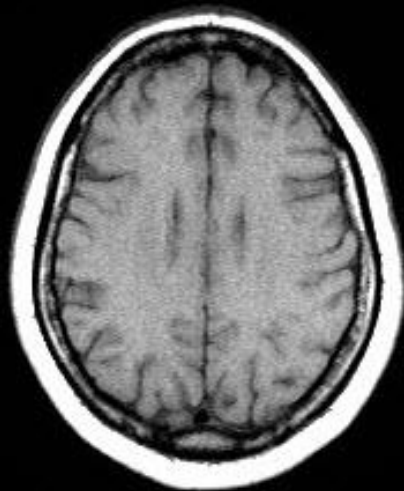

1

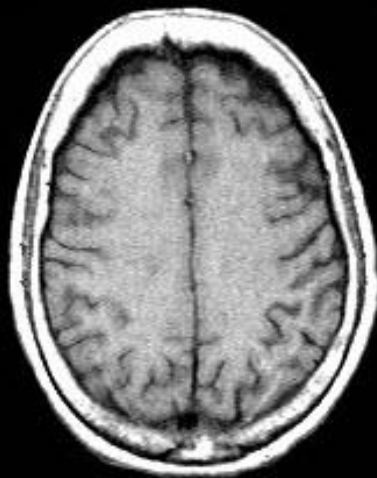

2

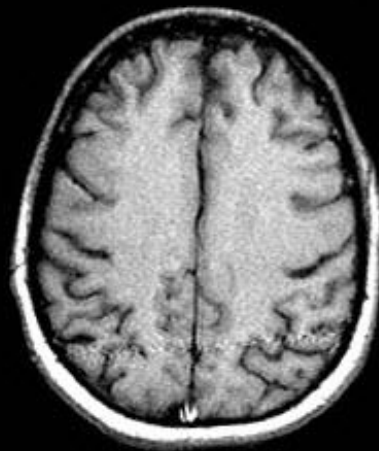

3

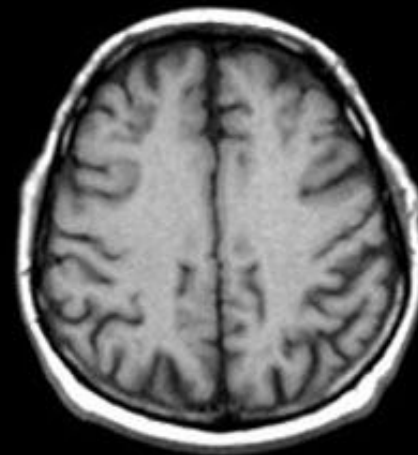

4

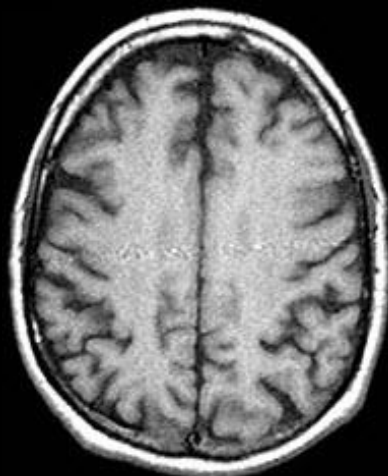

5

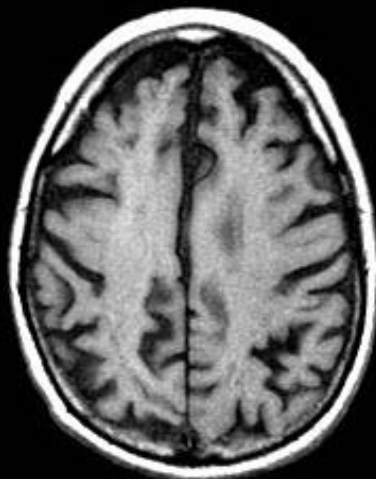

6

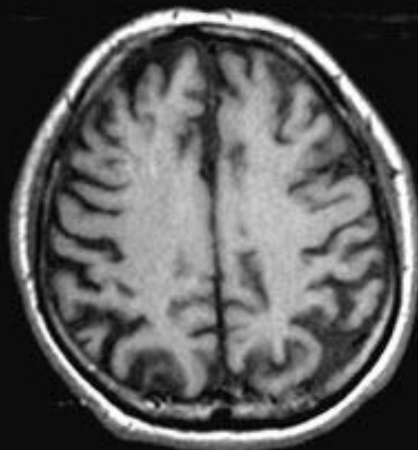

7

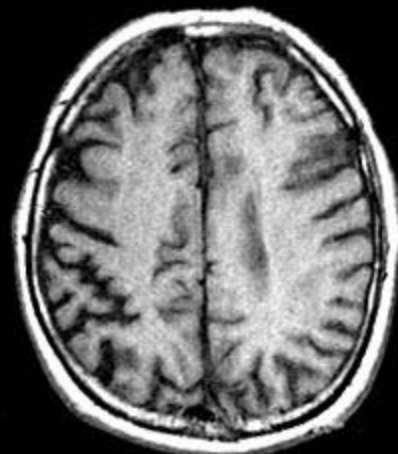

8

Supplement: supp_WNL.0b013e31821d753f_Figure_e-2.pdf [file supp_WNL.0b013e31821d753f_Figure_e-2.pdf]
